# Supplementary material for: GATA4 regulates Fgf16 to promote heart repair after injury
Source: Oxford University Press journal article supplement (doi:10.1242/dev.130971), 2016-01-01
Supplement: dev130971supp.pdf [file dev130971supp.pdf]

**Table S1.** Echocardiographic parameters

|                                    | CI                       |               | Sham                     |               |
|------------------------------------|--------------------------|---------------|--------------------------|---------------|
|                                    | Cre+                     | Cre-          | Cre+                     | Cre-          |
| <b>n</b>                           | 8                        | 6             | 6                        | 6             |
| <b>HR (BMP)</b>                    | 408.12± 37.9             | 453.16± 45.96 | 459± 18.9                | 418.66± 24.62 |
| <b>LVAW;d (Depth, mm)</b>          | 0.59± 0.04               | 0.69± 0.04    | 0.7± 0.02                | 0.72± 0.01    |
| <b>LVID;d (Depth, mm)</b>          | 4.17± 0.11 <sup>A</sup>  | 3.68± 0.18    | 3.36± 0.12               | 3.73± 0.02    |
| <b>LVPW;d (Depth, mm)</b>          | 0.6± 0.03 <sup>A</sup>   | 0.75± 0.05    | 0.63± 0.03               | 0.67± 0.03    |
| <b>LVAW;s (Depth, mm)</b>          | 0.95± 0.09               | 1.17± 0.1     | 1.16± 0.06               | 1.19± 0.06    |
| <b>LVID;s (Depth, mm)</b>          | 3.04± 0.2 <sup>A</sup>   | 2.11± 0.25    | 1.85± 0.16               | 2.03± 0.13    |
| <b>LVPW;s (Depth, mm)</b>          | 0.89± 0.07 <sup>A</sup>  | 1.18± 0.11    | 1.03± 0.07               | 1.12± 0.07    |
| <b>LV Vol;d (ul)</b>               | 77.96± 5.03 <sup>A</sup> | 58.83± 6.89   | 46.58± 4.25 <sup>A</sup> | 59.36± 0.79   |
| <b>LV Vol;s (ul)</b>               | 38.12± 5.77 <sup>A</sup> | 19.08± 6.21   | 11.35± 2.7               | 13.76± 2.17   |
| <b>%EF</b>                         | 52.6± 5.23 <sup>A</sup>  | 73.57± 5.5    | 76.17± 4.75              | 76.98± 3.43   |
| <b>%FS</b>                         | 27.42± 3.35 <sup>A</sup> | 43.13± 4.66   | 44.88± 4.02              | 45.6± 3.27    |
| <b>LV Mass (AW) (mg)</b>           | 87.68± 5.81              | 89.66± 6.03   | 69.53± 6.1               | 86.85± 2.63   |
| <b>LV Mass (AW) Corrected (mg)</b> | 70.14± 4.65              | 71.72± 4.82   | 55.62± 4.88 <sup>A</sup> | 69.48± 2.1    |

<sup>A</sup>P < 0.05 versus Cre+, Luc line. Cre+, iTnt-Cre;Gata4fl/fl; Cre-, NTg;Gata4fl/fl.

**Table S2.** Primer sequences used in qRT-PCR

| Gene             | Forward                        | Reverse                   |
|------------------|--------------------------------|---------------------------|
| <i>Gata4</i>     | AAACGGAAGCCCAAGAACCTGAAT       | GAGCTGGCCTGCGATGTCTGAGTG  |
| <i>Cyclin A2</i> | GGCTGACACTCTTTCCG              | CTGGTAGCAAGAATTAGAGCAT    |
| <i>Cyclin D1</i> | TGAGAACAAGCAGACCATCC           | TGAACTTCACATCTGTGGCA      |
| <i>Cyclin D2</i> | CACCGACAACCTCTGTGAAGC          | CCACTTCAGCTTACCCAACA      |
| <i>Cdk4</i>      | GGGACATCAAGGTCACCCTA           | CGCTTAGAAACTGACGCATT      |
| <i>Gdf15</i>     | GAGGACTCGAACTCAGAACCAAGT       | CCGGTTGACGCGGAGTAG        |
| <i>Anf</i>       | GTGTACAGTGC GG GTGTCCAA        | ACCTCATCTTCTACCGGCATC     |
| <i>Bnp</i>       | ACAAGATAGACCGGATCGGA           | AGCCAGGAGGTCTTCTTACA      |
| <i>Acta</i>      | AGGCGGTGCTGTCTCTCTAT           | GACATTGTGGGTGACACCAT      |
| <i>Fhl1</i>      | ACTGCGTGGATTGCTACAAG           | TTTACCAAACCCAGTGATGG      |
| <i>Thbs1</i>     | CCCTGATGGTAGCTGGAAAT           | CTCATCGACGTCTTTGCACT      |
| <i>Timp1</i>     | ATATCCGGTACGCCTACACC           | GCCCCGTGATGAGAAACTCTT     |
| <i>Col4a3</i>    | TTAAGTTCAGGCTGGTGCTG           | GCATGTCTCAGCTCAGGTGT      |
| <i>Fgf1</i>      | AGCTTTCTCCCAAGAGACCA           | TCATGGCGTTTGTGTCCTAT      |
| <i>Fgf2</i>      | CAACCGGTACCTTGCTATGA           | TCCGTGACCGGTAAGTATTG      |
| <i>Fgf3</i>      | ACCTGGTGCCAGAGACCTT            | GCAGGAAGAGAGAGGACTTTTGTG  |
| <i>Fgf8</i>      | GCTCATTGTGGAGACCGATACTT        | TGGCAATTAGCTTCCCCTTCT     |
| <i>Fgf9</i>      | GCGGTGGGTTCTTATTGATT           | AAATTGGCAAGTCCTCATCC      |
| <i>Fgf12</i>     | ATTCCTCAACCCTGTATCGC           | ATGAGATGAGGGCTTGGTTT      |
| <i>Fgf13</i>     | TATCACCCATATTAAGCCCCATAA       | AAAATTTGGCAGTCCTTCTTCCA   |
| <i>Fgf16</i>     | CCATGACTCAAGGGAGCTTT           | CTATGCCAATCCTGAAGGT       |
| <i>Fgf18</i>     | AGGAAGAATCTCTATTTTTGTACATTGTGT | GTTTCAGGTCAACAGTGGAATCCTA |
| <i>Vegfa</i>     | GAGGATGTCCTCACTCGGAT           | TCTCAGACCACACTGAAGCC      |
| <i>Vegfb</i>     | AGCCACCAGAAGAAAGTGGT           | GCTGGGCACTAGTTGTTTGA      |
| <i>Vegfc</i>     | CCCAAACCAGTCACAATCAG           | GGTAATGTTGCTGGCAGAGA      |
| <i>Gapdh</i>     | GAAGGGCTCATGACCACAG            | GATGCAGGGATGATGTTCTG      |

## Primer sequences used in ChIP-qPCR

| GATA Site on          | Forward                 | Reverse               |
|-----------------------|-------------------------|-----------------------|
| <i>Fgf16</i> Enhancer | CCCGGTCAACTATGAGAAGG    | GCCTGTCAGTTGGAAAGCTC  |
| <i>Fgf16</i> Control  | TTTTCGCTTCTCAGACCCCTGTG | TTCTCTGGCCAAAAGAGGCTG |

## Primer sequences used in amplifying fragment

| Fragment              | Forward                      | Reverse                       |
|-----------------------|------------------------------|-------------------------------|
| <i>Fgf16</i> Promoter | CTAGCTAGCTATGCTCATTGGTGTTCGC | CCCAAGCTTGTGCGGGCGCTCGCTTGCTC |
| <i>Fgf16</i> Intron   | CTAGCTAGCGTAAGTTCCAACCTTCTAT | CCCAAGCTTGTCTTCTGTGAGGGTGAG   |
| <i>Fgf16</i> Enhancer | CTAGCTAGCGAATGAGGGTTCCAGGGAC | CCCAAGCTTCTATATAAAGCTGCATGGG  |
